# Supplementary material for: Impact of benzannulation on ESIPT in 2-(2′-hydroxyphenyl)-oxazoles: a unified perspective in terms of excited-state aromaticity and intramolecular charge transfer
Source: Royal Society of Chemistry journal article supplement (doi:10.1039/d0ra05802e), 2020-01-01
Supplement: d0ra05802e1.pdf [file d0ra05802e1.pdf]

SUPPORTING INFORMATION

**Impact of benzannulation on ESIPT in 2-(2'-hydroxyphenyl)-oxazoles: a unified perspective in terms of excited-state aromaticity and intramolecular charge transfer**

Leandro D. Mena,<sup>a\*</sup> D. M. A. Vera<sup>b</sup> and María T. Baumgartner<sup>a\*</sup>

<sup>a</sup> *INFIQC, Departamento de Química Orgánica, Facultad de Ciencias Químicas, Universidad Nacional de Córdoba, Ciudad Universitaria, X5000HUA, Córdoba, Argentina.*

<sup>b</sup> *QUIAMM-INBIOTEC- Departamento de Química Facultad de Ciencias Exactas y Naturales, Universidad Nacional de Mar del Plata Mar del Plata, Argentina*

*\* Corresponding authors: L. D. M.: [lmena@fcq.unc.edu.ar](mailto:lmena@fcq.unc.edu.ar), M. T. B.: [tere@fcq.unc.edu.ar](mailto:tere@fcq.unc.edu.ar)*

## Contents

|    |                                                                                         |    |
|----|-----------------------------------------------------------------------------------------|----|
| 1. | $^1\text{H}$ and $^{13}\text{C}$ NMR spectra of <b>HNO</b>                              | 3  |
| 2. | MOs involved in $S_0 \rightarrow S_1$ excitation                                        | 4  |
| 3. | Emission energies for <b>HNO</b> (keto) computed with LR-PCM, cLR-PCM and SS-PCM models | 5  |
| 4. | Non- covalent interactions (NCI) analysis                                               | 5  |
| 5. | QTAIM analysis                                                                          | 7  |
| 6. | Energy levels                                                                           | 8  |
| 7. | Relevant information about stationary points                                            | 9  |
| 8. | Optimised coordinates for all compounds                                                 | 10 |

# 1. $^1\text{H}$ and $^{13}\text{C}$ NMR spectra of HNO

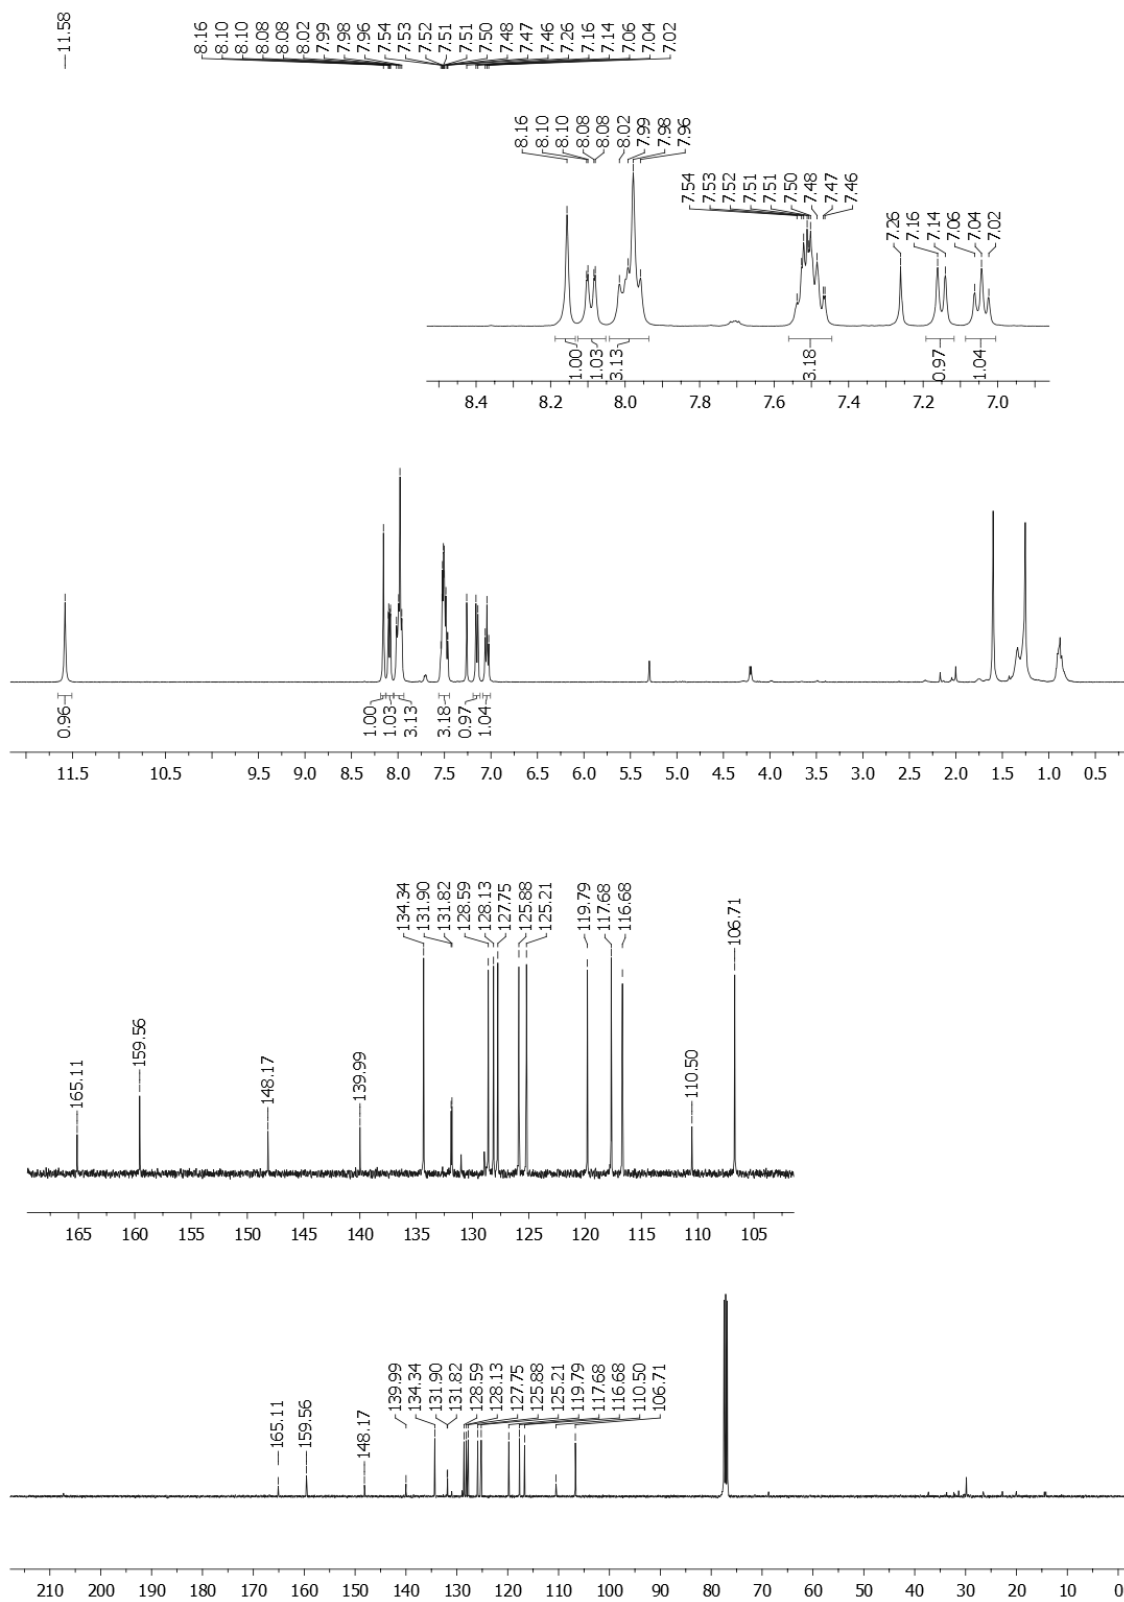

Figure S1.  $^1\text{H}$  (top) and  $^{13}\text{C}$  NMR (bottom) of HNO in CDCl<sub>3</sub>.

## 2. MOs involved in $S_0 \rightarrow S_1$ excitation

### a) HPO

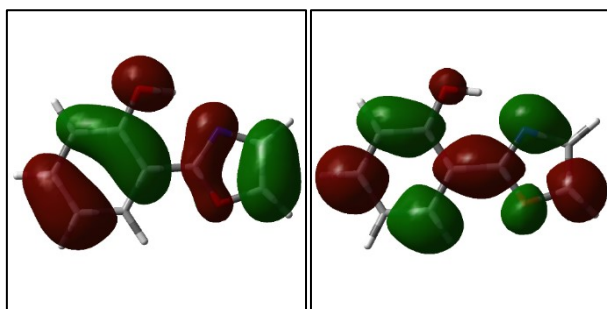

Figure S2. HOMO (left) and LUMO (right) of HPO in the  $S_0$  state.

Excited State 1: Singlet-A 4.0217 eV  
308.29 nm  $f=0.5103$   $\langle S^*2 \rangle = 0.000$   
42 -> 43 0.69245

### b) HBO

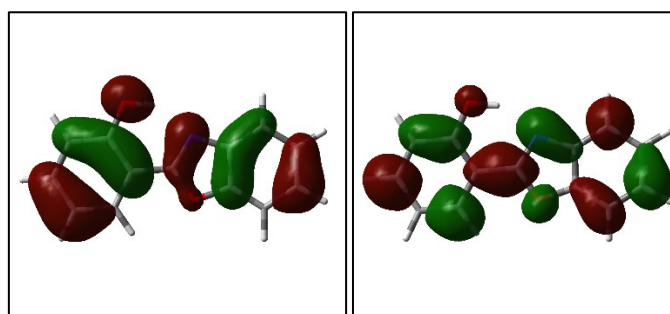

Figure S3. HOMO (left) and LUMO (right) of HBO in the  $S_0$  state

Excited State 1: Singlet-A 3.7671 eV  
329.12 nm  $f=0.8517$   $\langle S^*2 \rangle = 0.000$   
55 -> 56 0.69938

### c) HNO

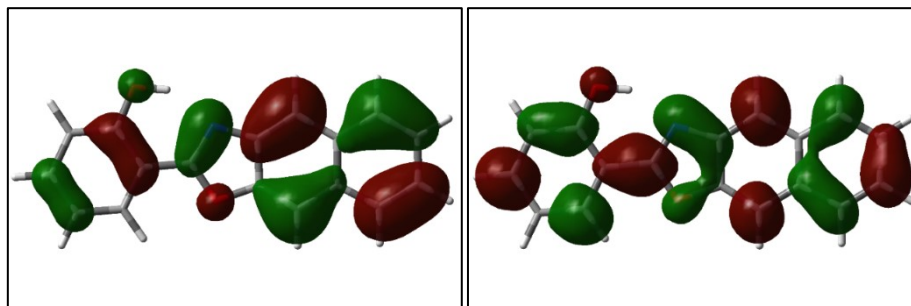

Figure S4. HOMO (left) and LUMO (right) of HNO in the  $S_0$  state

Excited State 1: Singlet-A  
3.4113 eV 363.45 nm  $f=0.6372$   $\langle S^*2 \rangle = 0.000$   
68 -> 69 0.69574

### 3. Emission energies for HNO (keto) computed with LR-PCM, cLR-PCM and SS-PCM models

**Table S1** Emission energies of HNO (in eV) calculated using different functionals with continuum solvation models for acetonitrile. The error with respect to the experimental fluorescence energies are presented in parentheses. MUE: mean unsigned error (in eV).

|                  | B3LYP        | CAM-B3LYP   | M06-2X      | PBE0         | $\omega$ B97XD | MUE  |
|------------------|--------------|-------------|-------------|--------------|----------------|------|
| <i>enol form</i> |              |             |             |              |                |      |
| LR-PCM           | 2.86 (-0.13) | 3.23 (0.24) | 3.25 (0.26) | 3.00 (0.01)  | 3.29 (0.30)    | 0.19 |
| cLR-PCM          | 3.69 (0.70)  | 3.49 (0.50) | 3.50 (0.51) | 3.09 (0.10)  | 3.56 (0.57)    | 0.48 |
| SS-PCM           | 2.03 (-0.96) | 3.19 (0.20) | 3.1 (0.11)  | 2.23 (-0.76) | 3.45 (0.46)    | 0.50 |
| <i>keto form</i> |              |             |             |              |                |      |
| LR-PCM           | 2.57 (0.06)  | 2.88 (0.37) | 2.84 (0.33) | 2.68 (0.17)  | 2.89 (0.38)    | 0.26 |
| cLR-PCM          | 2.65 (0.14)  | 3.07 (0.56) | 3.04 (0.53) | 2.78 (0.27)  | 3.09 (0.58)    | 0.42 |
| SS-PCM           | 2.16 (-0.35) | 3.13 (0.62) | 3.04 (0.53) | 2.41 (-0.11) | 3.11 (0.60)    | 0.44 |

**Table S2.** Emission energies of HNO (in eV) calculated using different functionals with continuum solvation models for cyclohexane. The error with respect to the experimental fluorescence energies are presented in parentheses. MUE: mean unsigned error (in eV).

|                  | B3LYP        | CAM-B3LYP   | M06-2X      | PBE0         | $\omega$ B97XD | MUE  |
|------------------|--------------|-------------|-------------|--------------|----------------|------|
| <i>enol form</i> |              |             |             |              |                |      |
| LR-PCM           | 2.96         | 3.43        | 3.44        | 3.12         | 3.49           | -    |
| cLR-PCM          | 2.91         | 3.53        | 3.54        | 3.12         | 3.59           | -    |
| SS-PCM           | 2.63         | 3.51        | 3.51        | 2.87         | 3.59           | -    |
| <i>keto form</i> |              |             |             |              |                |      |
| LR-PCM           | 2.49 (-0.02) | 2.92 (0.41) | 2.89 (0.38) | 2.63 (0.12)  | 2.95 (0.44)    | 0.27 |
| cLR-PCM          | 2.47 (-0.04) | 2.99 (0.48) | 2.96 (0.45) | 2.63 (0.12)  | 3.02 (0.51)    | 0.31 |
| SS-PCM           | 2.29 (-0.22) | 2.99 (0.48) | 2.95 (0.44) | 2.51 (-0.00) | 3.03 (0.51)    | 0.33 |

### 4. Non-covalent interactions (NCI) analysis

For the analysis of the OH-- $\pi$  interaction the RDG function has been used

$$RDG(r) = \frac{1}{2(3\pi^2)^{1/3}} \frac{|\nabla\rho(r)|}{\rho(r)^{4/3}} \quad (1)$$

where  $\rho(r)$  is the total electron density and the RDG (r) is the reduced density gradient of the exchange contribution. According to Atoms in Molecules (AIM) theory the nature of a weak interaction depends on both the  $\lambda_2$  eigenvalue and the electron density:

$$\Omega(r) = \text{Sign}(\lambda_2(r))\rho(r) \quad (2)$$

When  $\lambda_2 > 0$  the interaction is bonding, and the opposite if  $\lambda_2 < 0$ . In Fig. S9-S11 the scatter plots of RDG function vs.  $\Omega(r)$  function are shown for HPO, HBO and HNO in the  $S_0$  and  $S_1$  states. It is important to note that the left spike (marked with red circle) shifts to

the left in  $S_1$  in the case of **HPO** and **HBO**, indicating a strengthening in the OH- $\pi$  interaction upon excitation, whereas remains almost unaltered in **HNO**.

a) **HPO**

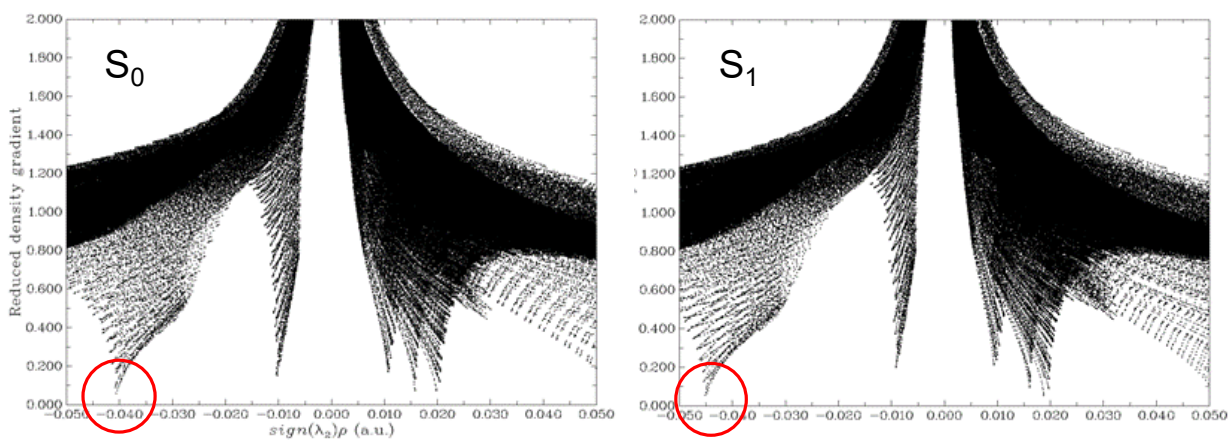

**Figure S5** RDG scatter plots (isovalue=0.6) in  $S_0$  and  $S_1$ . The left spike correspond to the attractive OH- $\pi$  interaction.

b) **HBO**

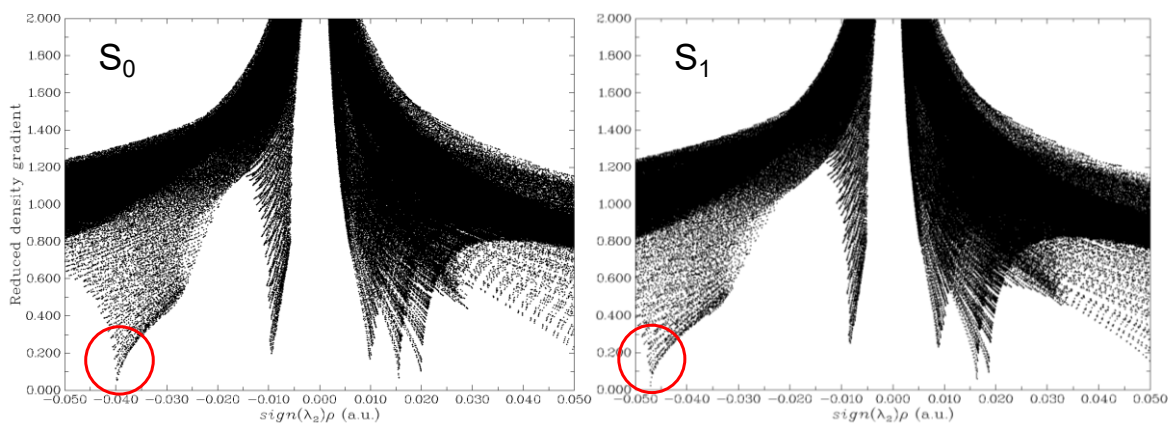

**Figure S6** RDG scatter plots (isovalue=0.6) in  $S_0$  and  $S_1$ . The left spike correspond to the attractive OH- $\pi$  interaction.

c) **HNO**

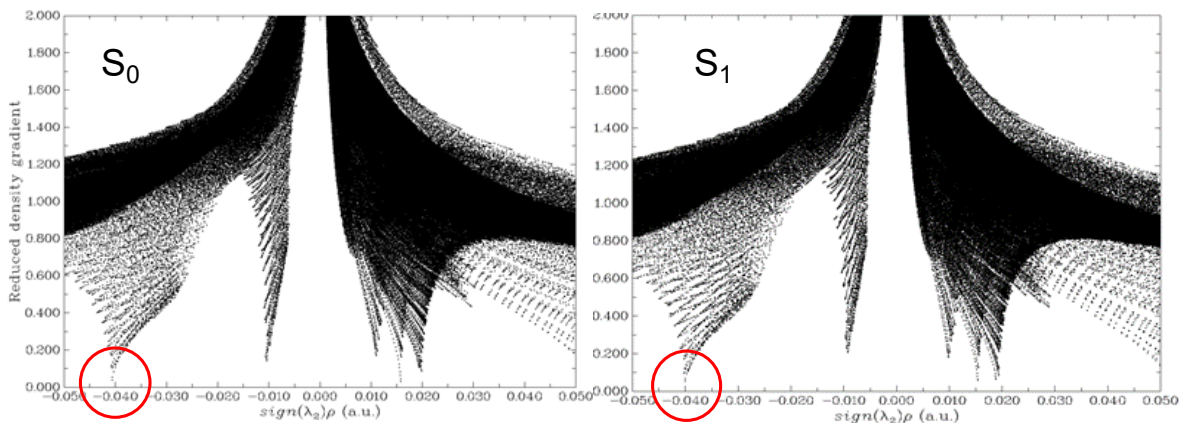

**Figure S7** RDG scatter plots (isovalue=0.6) in  $S_0$  and  $S_1$ . The left spike correspond to the attractive OH- $\pi$  interaction.

## 5. QTAIM analysis

According to the QTAIM approach, a bonding interaction is related to the existence of a path of maximum electron density  $\rho(r)$  (the bond path) connecting the corresponding atomic basins. A *bond critical point* (BCP) is a point along this bond path at the interatomic surface where  $\rho(r)$  reaches a minimum value. In the present case, we analysed the topology of  $\rho(r)$ , looking for the presence of a BCP between the hydrogen atom and the N acceptor, and then we calculated  $\rho(r)$ , its Laplacian,  $\nabla^2\rho(r)$  and the potential energy density  $V(r)$  at that BCP. According to the equation proposed by Espinosa *et al.* [i], the H-bond energy can be estimated from  $V(r)$  as follows:

$$E_{HB} = \frac{1}{2} V(r) \quad (1)$$

Topological analysis revealed the existence of strong hydrogen bonds in all compounds in both  $S_0$  and  $S_1$  states (Table 5 in main text). (Note: A H-bond is defined as “strong” when  $\rho(r) \geq 0.03$ ) [ii]. Good correlations were found between the H-N distance and  $\rho(r)$ ,  $\nabla^2\rho(r)$ , total electron energy density  $H(r)$  and H-bond energy (Fig. S8). According to QTAIM analysis results, the H-bond in **HPO** results considerably strengthened by 2.05 kcal/mol in  $S_1$ , whereas in **HBO** the interaction increases its intensity in 1.17 kcal/mol. Unlike these cases, photoexcitation weakens the intramolecular H-bond of **HNO** by 0.18 kcal/mol, in agreement with the observed in IR calculations and NCI analysis.

**Table S3** Selected parameters related to H-bond for studied the *enol* forms of the studied compounds obtained from QTAIM analysis

| Dye/state  | H-N distance (Å) | $\rho(r)$ , a.u. | $\nabla^2\rho(r)$ , a.u. | H-bond energy <sup>a</sup> | $\Delta E$ H-bond $S_0 \rightarrow S_1$ <sup>a</sup> |
|------------|------------------|------------------|--------------------------|----------------------------|------------------------------------------------------|
| <b>HPO</b> | $S_0$            | 1.8093           | 0.0399                   | 0.1178                     | 10.18                                                |
|            | $S_1$            | 1.7317           | 0.0471                   | 0.1341                     | 12.23                                                |
| <b>HBO</b> | $S_0$            | 1.8003           | 0.0407                   | 0.1201                     | 10.50                                                |
|            | $S_1$            | 1.7552           | 0.0451                   | 0.1292                     | 11.64                                                |
| <b>HNO</b> | $S_0$            | 1.8008           | 0.0407                   | 0.1195                     | 10.45                                                |
|            | $S_1$            | 1.8046           | 0.0401                   | 0.1184                     | 10.26                                                |

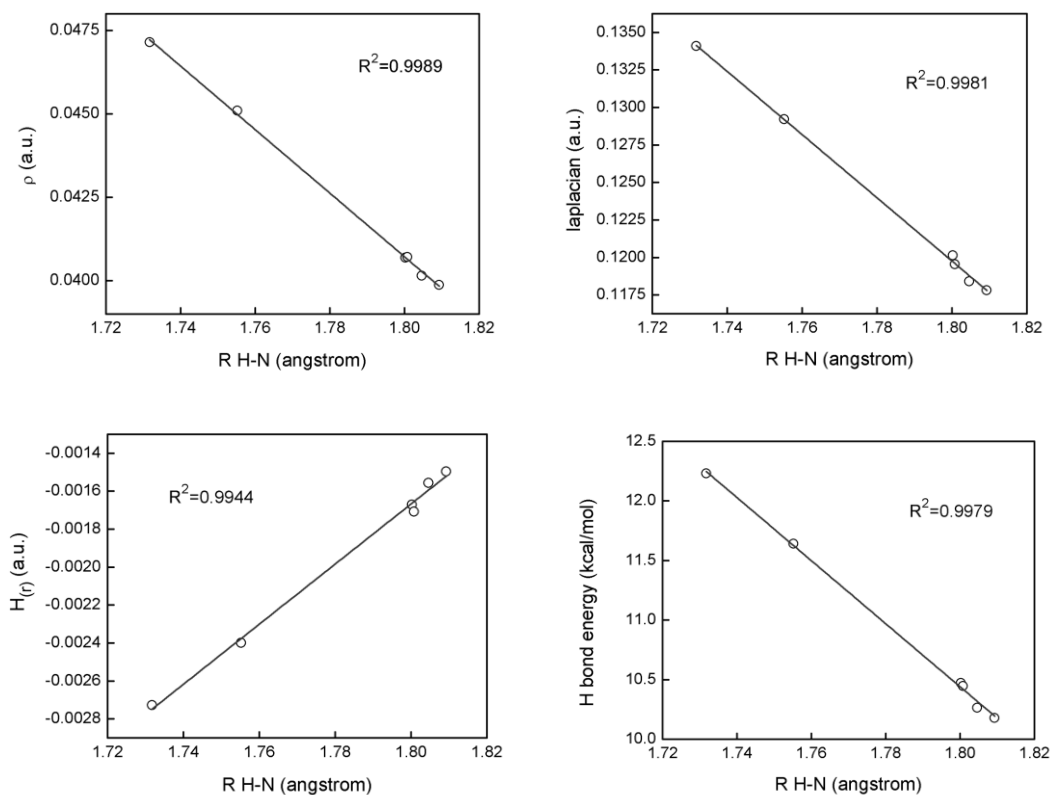

**Figure S8.** Correlation between H-N bond length and  $\rho(r)$ ,  $\nabla^2\rho(r)$ ,  $H(r)$  and hydrogen bond energy estimated via potential energy density  $V(r)$  BCP.

## 6. Energy levels

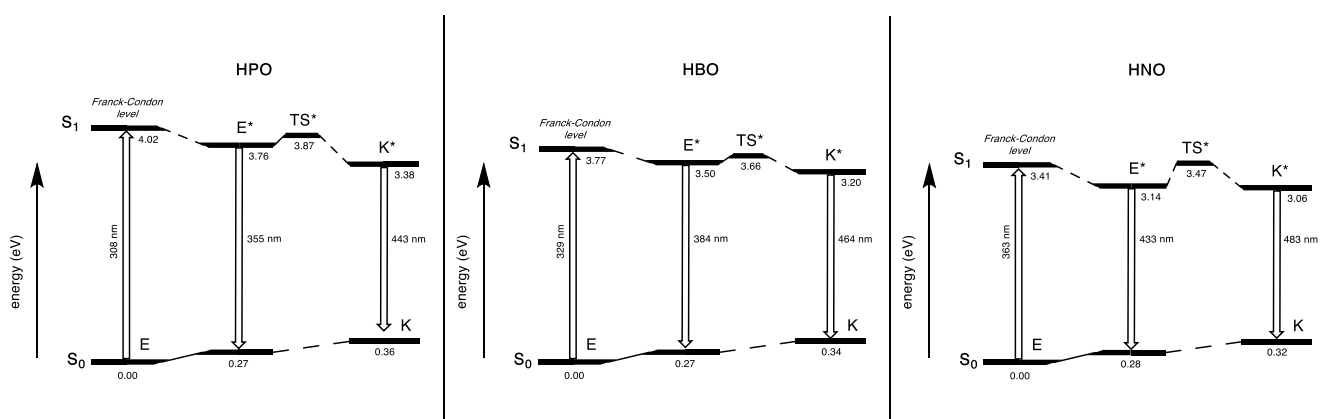

**Figure S9.** Jablonski diagram (in eV) related to the ESIPt process of **HPO**, **HBO** and **HNO**, calculated at B3LYP/6-31+G(d)//PCM in acetonitrile.



## 7. Relevant information about stationary points

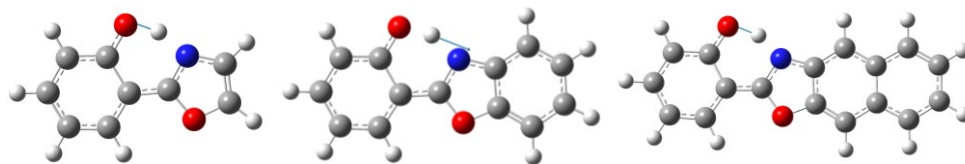

**Figure S10.** Structures of  $S_1$  transition state for HPO, HBO and HNO showing the displacement vectors over the imaginary frequency mode.

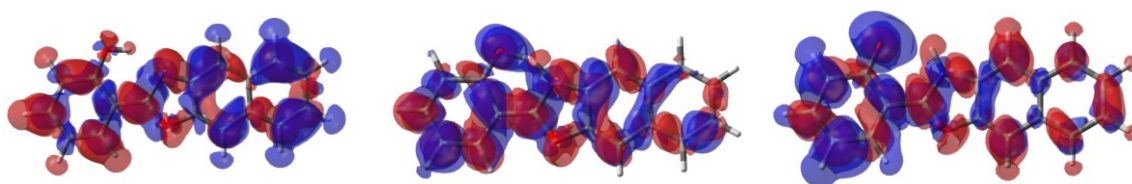

**Figure S11.** Density difference plots ( $\Delta\rho = \rho_{S_1} - \rho_{S_0}$ , isovalue=0.0004) for the  $E^*$  (left),  $TS^*$  (middle) and  $K^*$  (right) stationary points on the  $S_1$  PES of HNO. The blue/red zones indicate a decrease/increase of electron density upon excitation, respectively.

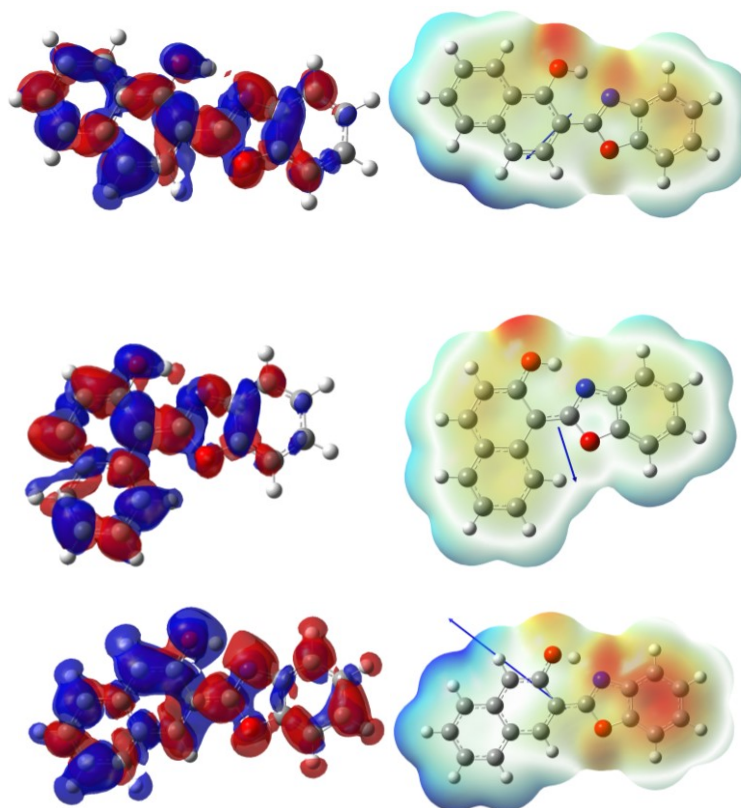

**Figure S12.** (Left) Density difference plots ( $\Delta\rho = \rho_{S_1} - \rho_{S_0}$ , isovalue=0.0004) for the *enol* form of 1H2NBO (top), 2H1NBO (middle) and 2H3NBO (bottom). The blue/red zones indicate a decrease/increase of electron density upon excitation, respectively. (Right) electrostatic potential maps and dipole moment vectors for the three compounds. It is apparent that the ICT character is larger for 2H3NBO than for its isomers.

## 8. Optimised coordinates for all compounds

### HPO (S<sub>0</sub>), enol tautomer

|   |               |               |               |
|---|---------------|---------------|---------------|
| C | 3.1207120000  | 0.5437080000  | -0.0000780000 |
| C | 3.1406930000  | -0.8119930000 | 0.0000240000  |
| O | 1.8366470000  | -1.2535610000 | 0.0000720000  |
| N | 1.7980640000  | 0.9691970000  | -0.0000950000 |
| C | 1.0763120000  | -0.1283050000 | -0.0000040000 |
| C | -0.3729240000 | -0.2200590000 | 0.0000200000  |
| C | -1.0319890000 | -1.4654150000 | 0.0001220000  |
| C | -1.1458050000 | 0.9699020000  | -0.0000590000 |
| C | -2.4203710000 | -1.5389190000 | 0.0001450000  |
| H | -0.4376110000 | -2.3739390000 | 0.0001830000  |
| C | -2.5449130000 | 0.8863560000  | -0.0000350000 |
| C | -3.1749180000 | -0.3555260000 | 0.0000660000  |
| H | -2.9138030000 | -2.5060960000 | 0.0002240000  |
| H | -3.1190660000 | 1.8083260000  | -0.0000970000 |
| H | -4.2605830000 | -0.4028790000 | 0.0000830000  |
| O | -0.5858580000 | 2.2067050000  | -0.0001590000 |
| H | 0.4018020000  | 2.1164050000  | -0.0001660000 |
| H | 3.9473010000  | 1.2390800000  | -0.0001390000 |
| H | 3.9084120000  | -1.5689170000 | 0.0000720000  |

### HPO (S<sub>1</sub>), enol tautomer

|   |               |               |               |
|---|---------------|---------------|---------------|
| C | 3.0931280000  | 0.5784970000  | -0.0000810000 |
| C | 3.1418370000  | -0.8053470000 | 0.0000250000  |
| O | 1.8591370000  | -1.2874470000 | 0.0000750000  |
| N | 1.8063880000  | 0.9972030000  | -0.0000990000 |
| C | 1.0539990000  | -0.1446030000 | -0.0000040000 |
| C | -0.3371110000 | -0.2483390000 | 0.0000210000  |
| C | -1.0387600000 | -1.4997380000 | 0.0001240000  |
| C | -1.1544110000 | 0.9791500000  | -0.0000590000 |
| C | -2.4272480000 | -1.5247730000 | 0.0001440000  |
| H | -0.4688610000 | -2.4220980000 | 0.0001860000  |
| C | -2.5495950000 | 0.9144220000  | -0.0000360000 |
| C | -3.1958400000 | -0.3308100000 | 0.0000650000  |
| H | -2.9392580000 | -2.4834430000 | 0.0002220000  |
| H | -3.1078360000 | 1.8458000000  | -0.0000980000 |
| H | -4.2802320000 | -0.3819060000 | 0.0000830000  |
| O | -0.5677900000 | 2.1803660000  | -0.0001560000 |
| H | 0.4328310000  | 2.0701700000  | -0.0001630000 |
| H | 3.9289430000  | 1.2655770000  | -0.0001420000 |
| H | 3.9429370000  | -1.5286290000 | 0.0000710000  |

### HPO (S<sub>0</sub>), keto tautomer

|   |               |              |              |
|---|---------------|--------------|--------------|
| C | -3.1155610000 | 0.5421110000 | 0.0000490000 |
|---|---------------|--------------|--------------|

|   |               |               |               |
|---|---------------|---------------|---------------|
| C | -3.1328080000 | -0.8054370000 | 0.0000110000  |
| O | -1.8236440000 | -1.2680450000 | -0.0000240000 |
| N | -1.7751980000 | 0.9076510000  | 0.0000240000  |
| C | -1.0166310000 | -0.1931280000 | 0.0000100000  |
| C | 0.4001770000  | -0.2386260000 | 0.0000150000  |
| C | 1.0987970000  | -1.4736930000 | -0.0001330000 |
| C | 1.1047630000  | 1.0345640000  | 0.0000590000  |
| C | 2.4785290000  | -1.4997280000 | -0.0001510000 |
| H | 0.5319650000  | -2.4011530000 | -0.0001840000 |
| C | 2.5390800000  | 0.9439260000  | 0.0000420000  |
| C | 3.1916050000  | -0.2727010000 | -0.0000830000 |
| H | 3.0132530000  | -2.4446750000 | -0.0002430000 |
| H | 3.0969550000  | 1.8772200000  | 0.0001280000  |
| H | 4.2796430000  | -0.2928250000 | -0.0001190000 |
| O | 0.4887220000  | 2.1627470000  | 0.0001650000  |
| H | -1.2783890000 | 1.8157670000  | 0.0001310000  |
| H | -3.9170060000 | 1.2635480000  | 0.0000840000  |
| H | -3.9083660000 | -1.5527980000 | -0.0000070000 |

HPO (S<sub>1</sub>), keto tautomer

|   |               |               |               |
|---|---------------|---------------|---------------|
| C | 3.1755430000  | 0.5210140000  | 0.0005140000  |
| C | 3.1481070000  | -0.8330520000 | -0.0004260000 |
| O | 1.8278990000  | -1.2623120000 | -0.0007670000 |
| N | 1.8673800000  | 0.9454710000  | 0.0008690000  |
| C | 1.0377950000  | -0.1393910000 | -0.0002050000 |
| C | -0.3868750000 | -0.2160110000 | -0.0002420000 |
| C | -1.0583930000 | -1.4380440000 | 0.0000110000  |
| C | -1.1748980000 | 1.0291710000  | -0.0007290000 |
| C | -2.4881210000 | -1.4977680000 | 0.0000590000  |
| H | -0.4941730000 | -2.3656650000 | 0.0001960000  |
| C | -2.5950580000 | 0.9187450000  | 0.0002270000  |
| C | -3.2493290000 | -0.3352350000 | 0.0003700000  |
| H | -2.9676730000 | -2.4723740000 | 0.0001950000  |
| H | -3.1628560000 | 1.8454850000  | 0.0005380000  |
| H | -4.3342770000 | -0.3843150000 | 0.0007860000  |
| O | -0.5736720000 | 2.1627850000  | 0.0000020000  |
| H | 1.4832690000  | 1.8877380000  | 0.0006270000  |
| H | 4.0089070000  | 1.2064980000  | 0.0010390000  |
| H | 3.9087000000  | -1.5960210000 | -0.0008140000 |

HPO (S<sub>1</sub>), TS

-1264.5 cm<sup>-1</sup>

|   |               |               |               |
|---|---------------|---------------|---------------|
| C | -3.0567700000 | 0.6067140000  | 0.0003850000  |
| C | -3.1705260000 | -0.7585850000 | 0.0002180000  |
| O | -1.8996070000 | -1.3157150000 | -0.0000280000 |
| N | -1.7332260000 | 0.9353500000  | -0.0001780000 |
| C | -1.0411050000 | -0.2368740000 | -0.0002200000 |
| C | 0.3646780000  | -0.3167460000 | -0.0003250000 |

|   |               |               |               |
|---|---------------|---------------|---------------|
| C | 1.1270600000  | -1.4999120000 | -0.0004110000 |
| C | 1.0947000000  | 0.9724900000  | 0.0000190000  |
| C | 2.5386700000  | -1.4397760000 | -0.0001950000 |
| H | 0.6277780000  | -2.4632710000 | -0.0005970000 |
| C | 2.5074900000  | 0.9881890000  | 0.0003280000  |
| C | 3.2331790000  | -0.2142060000 | 0.0001930000  |
| H | 3.0982870000  | -2.3711000000 | -0.0002570000 |
| H | 3.0038470000  | 1.9541250000  | 0.0006350000  |
| H | 4.3182570000  | -0.1998750000 | 0.0004060000  |
| O | 0.4114960000  | 2.0915180000  | 0.0001180000  |
| H | -0.7495640000 | 1.8142570000  | -0.0006010000 |
| H | -3.8428670000 | 1.3483690000  | 0.0006370000  |
| H | -4.0025370000 | -1.4441450000 | 0.0003530000  |

HPO K\*<sub>90</sub> (S<sub>1</sub>)

|   |               |               |               |
|---|---------------|---------------|---------------|
| C | 3.1306990000  | 0.1341760000  | 0.5566760000  |
| C | 3.0347490000  | -0.1458710000 | -0.7542850000 |
| O | 1.7499470000  | -0.5163750000 | -1.0789470000 |
| N | 1.8838600000  | -0.1125580000 | 1.1453250000  |
| C | 1.0375270000  | -0.5345580000 | 0.1135580000  |
| C | -0.4529480000 | -0.3641820000 | 0.0704210000  |
| C | -1.2902850000 | -1.4506440000 | 0.1433750000  |
| C | -0.9926110000 | 0.9640410000  | -0.0585880000 |
| C | -2.6983080000 | -1.2735400000 | 0.0810370000  |
| H | -0.8751610000 | -2.4512430000 | 0.2418610000  |
| C | -2.4305530000 | 1.1243050000  | -0.1207600000 |
| C | -3.2532350000 | 0.0133400000  | -0.0514930000 |
| H | -3.3501580000 | -2.1407330000 | 0.1334060000  |
| H | -2.8306140000 | 2.1294660000  | -0.2211670000 |
| H | -4.3338820000 | 0.1243370000  | -0.0993230000 |
| O | -0.1972170000 | 1.9527860000  | -0.0943400000 |
| H | 1.5332770000  | 0.5234120000  | 1.8559880000  |
| H | 3.9831690000  | 0.4549370000  | 1.1356860000  |
| H | 3.7543130000  | -0.1459640000 | -1.5570810000 |

HBO (S<sub>0</sub>), enol tautomer

|   |               |               |               |
|---|---------------|---------------|---------------|
| C | 4.3158560000  | -0.7382090000 | 0.0000130000  |
| C | 4.2956690000  | 0.6708030000  | -0.0000760000 |
| H | 3.1388780000  | -2.5746820000 | 0.0001360000  |
| C | 3.1339300000  | -1.4897470000 | 0.0000680000  |
| C | 3.0960490000  | 1.3879400000  | -0.0001130000 |
| C | 1.9106180000  | 0.6462580000  | -0.0000590000 |
| C | 1.9586450000  | -0.7545370000 | 0.0000300000  |
| H | 3.0813840000  | 2.4734810000  | -0.0001830000 |
| O | 0.6592230000  | -1.2169430000 | 0.0000700000  |
| N | 0.5706680000  | 1.0331150000  | -0.0000770000 |
| C | -0.1130860000 | -0.0848900000 | 0.0000070000  |
| C | -1.5569080000 | -0.2107480000 | 0.0000290000  |

|   |               |               |               |
|---|---------------|---------------|---------------|
| C | -2.1833890000 | -1.4741750000 | 0.0001310000  |
| C | -2.3601440000 | 0.9604260000  | -0.0000510000 |
| C | -3.5682020000 | -1.5832800000 | 0.0001570000  |
| H | -1.5647680000 | -2.3660750000 | 0.0001930000  |
| C | -3.7567860000 | 0.8393100000  | -0.0000250000 |
| C | -4.3526590000 | -0.4186110000 | 0.0000780000  |
| H | -4.0373640000 | -2.5623410000 | 0.0002380000  |
| H | -4.3552280000 | 1.7455360000  | -0.0000880000 |
| H | -5.4367000000 | -0.4944140000 | 0.0000960000  |
| O | -1.8344330000 | 2.2097060000  | -0.0001600000 |
| H | -0.8443580000 | 2.1460400000  | -0.0001730000 |
| H | 5.2374510000  | 1.2122940000  | -0.0001180000 |
| H | 5.2701450000  | -1.2569970000 | 0.0000380000  |

HBO (S<sub>1</sub>), enol tautomer

|   |               |               |               |
|---|---------------|---------------|---------------|
| C | 4.3185470000  | -0.7250510000 | 0.0000180000  |
| C | 4.2874540000  | 0.6919560000  | -0.0000690000 |
| H | 3.1508640000  | -2.5759490000 | 0.0001360000  |
| C | 3.1336020000  | -1.4911700000 | 0.0000700000  |
| C | 3.0938730000  | 1.4043990000  | -0.0001080000 |
| C | 1.8875660000  | 0.6551940000  | -0.0000570000 |
| C | 1.9548620000  | -0.7773090000 | 0.0000300000  |
| H | 3.0717450000  | 2.4894090000  | -0.0001730000 |
| O | 0.6757940000  | -1.2615250000 | 0.0000650000  |
| N | 0.5943060000  | 1.0367530000  | -0.0000780000 |
| C | -0.1371540000 | -0.1204910000 | -0.0000040000 |
| C | -1.5267150000 | -0.2388760000 | 0.0000180000  |
| C | -2.2056250000 | -1.5014720000 | 0.0001210000  |
| C | -2.3590180000 | 0.9723000000  | -0.0000520000 |
| C | -3.5904210000 | -1.5570950000 | 0.0001580000  |
| H | -1.6159010000 | -2.4116050000 | 0.0001760000  |
| C | -3.7511390000 | 0.8777800000  | -0.0000100000 |
| C | -4.3750010000 | -0.3760230000 | 0.0000950000  |
| H | -4.0844190000 | -2.5250310000 | 0.0002390000  |
| H | -4.3280310000 | 1.7978810000  | -0.0000650000 |
| H | -5.4587880000 | -0.4426250000 | 0.0001250000  |
| O | -1.7992920000 | 2.1899960000  | -0.0001730000 |
| H | -0.7998760000 | 2.0999710000  | -0.0002300000 |
| H | 5.2297690000  | 1.2328110000  | -0.0001050000 |
| H | 5.2774990000  | -1.2347490000 | 0.0000460000  |

HBO (S<sub>0</sub>), keto tautomer

|   |               |               |               |
|---|---------------|---------------|---------------|
| C | -4.3069440000 | -0.7366980000 | -0.0001390000 |
| C | -4.2875450000 | 0.6694390000  | 0.0000690000  |
| H | -3.1238330000 | -2.5719990000 | -0.0002120000 |
| C | -3.1230430000 | -1.4874780000 | -0.0000520000 |
| C | -3.0883330000 | 1.3912160000  | 0.0002910000  |
| C | -1.9141370000 | 0.6424270000  | 0.0001710000  |

|   |               |               |               |
|---|---------------|---------------|---------------|
| C | -1.9501110000 | -0.7544590000 | 0.0000100000  |
| H | -3.0727280000 | 2.4757980000  | 0.0003860000  |
| O | -0.6448130000 | -1.2317060000 | -0.0000380000 |
| N | -0.5611520000 | 0.9721540000  | 0.0001040000  |
| C | 0.1690630000  | -0.1518770000 | 0.0000580000  |
| C | 1.5775930000  | -0.2277130000 | 0.0000190000  |
| C | 2.2458640000  | -1.4836410000 | -0.0001190000 |
| C | 2.3198410000  | 1.0278310000  | 0.0000740000  |
| C | 3.6216290000  | -1.5451190000 | -0.0000990000 |
| H | 1.6542690000  | -2.3951750000 | -0.0001680000 |
| C | 3.7527090000  | 0.8970290000  | -0.0000240000 |
| C | 4.3693120000  | -0.3358620000 | -0.0001720000 |
| H | 4.1320620000  | -2.5033100000 | -0.0001260000 |
| H | 4.3355040000  | 1.8147010000  | 0.0000460000  |
| H | 5.4562200000  | -0.3872320000 | -0.0001400000 |
| O | 1.7394700000  | 2.1706400000  | -0.0000950000 |
| H | -0.0378560000 | 1.8644850000  | 0.0002800000  |
| H | -5.2280930000 | 1.2120040000  | 0.0000470000  |
| H | -5.2601280000 | -1.2563910000 | -0.0002950000 |

HBO (S<sub>1</sub>), keto tautomer

|   |               |               |               |
|---|---------------|---------------|---------------|
| C | -4.3288860000 | -0.7699590000 | 0.0010860000  |
| C | -4.3363720000 | 0.6345650000  | 0.0017920000  |
| H | -3.1001310000 | -2.5817250000 | -0.0008200000 |
| C | -3.1219060000 | -1.4972660000 | -0.0001950000 |
| C | -3.1526190000 | 1.3854510000  | 0.0012920000  |
| C | -1.9534320000 | 0.6630540000  | 0.0000990000  |
| C | -1.9623530000 | -0.7454660000 | -0.0005780000 |
| H | -3.1623940000 | 2.4701180000  | 0.0018090000  |
| O | -0.6591510000 | -1.2002580000 | -0.0021110000 |
| N | -0.6268530000 | 1.0212040000  | -0.0009800000 |
| C | 0.1574320000  | -0.0961190000 | -0.0026740000 |
| C | 1.5798430000  | -0.2088370000 | -0.0009440000 |
| C | 2.2161220000  | -1.4480780000 | -0.0002910000 |
| C | 2.3992240000  | 1.0168870000  | -0.0003380000 |
| C | 3.6399820000  | -1.5495080000 | 0.0012620000  |
| H | 1.6244220000  | -2.3584680000 | -0.0010840000 |
| C | 3.8183870000  | 0.8624720000  | 0.0013620000  |
| C | 4.4330520000  | -0.4056240000 | 0.0021510000  |
| H | 4.0931880000  | -2.5363260000 | 0.0016700000  |
| H | 4.4131240000  | 1.7719660000  | 0.0020950000  |
| H | 5.5161360000  | -0.4860760000 | 0.0033710000  |
| O | 1.8361920000  | 2.1670700000  | -0.0013710000 |
| H | -0.1843890000 | 1.9404610000  | -0.0006870000 |
| H | -5.2884160000 | 1.1577950000  | 0.0027550000  |
| H | -5.2707520000 | -1.3101010000 | 0.0014700000  |

HBO (S<sub>1</sub>), TS

-1346.5 cm<sup>-1</sup>

|   |               |               |               |
|---|---------------|---------------|---------------|
| C | 4.3339950000  | -0.6673360000 | 0.0001440000  |
| C | 4.2542450000  | 0.7403780000  | -0.0000910000 |
| H | 3.2218800000  | -2.5524340000 | 0.0004150000  |
| C | 3.1733870000  | -1.4685130000 | 0.0002210000  |
| C | 3.0314280000  | 1.4157100000  | -0.0002790000 |
| C | 1.8625070000  | 0.6275870000  | -0.0002250000 |
| C | 1.9701930000  | -0.7920640000 | 0.0000360000  |
| H | 2.9764210000  | 2.4994410000  | -0.0004460000 |
| O | 0.7017580000  | -1.3299060000 | 0.0000530000  |
| N | 0.5373590000  | 0.9345210000  | -0.0004410000 |
| C | -0.1509290000 | -0.2406220000 | -0.0001490000 |
| C | -1.5557600000 | -0.3163460000 | -0.0000140000 |
| C | -2.3135910000 | -1.5015420000 | 0.0000120000  |
| C | -2.2817030000 | 0.9746700000  | 0.0001060000  |
| C | -3.7204400000 | -1.4475460000 | 0.0001200000  |
| H | -1.8080990000 | -2.4618280000 | -0.0000770000 |
| C | -3.6948200000 | 0.9819760000  | 0.0000780000  |
| C | -4.4134840000 | -0.2194140000 | 0.0001390000  |
| H | -4.2802870000 | -2.3784900000 | 0.0001310000  |
| H | -4.1965560000 | 1.9451610000  | 0.0001100000  |
| H | -5.4988490000 | -0.2065980000 | 0.0001810000  |
| O | -1.6018310000 | 2.0938830000  | 0.0002340000  |
| H | -0.4287110000 | 1.8092310000  | -0.0002730000 |
| H | 5.1749430000  | 1.3175560000  | -0.0001190000 |
| H | 5.3081640000  | -1.1471350000 | 0.0002850000  |

HBO K\*<sub>90</sub>(S<sub>1</sub>)

|   |               |               |               |
|---|---------------|---------------|---------------|
| C | 4.1882390000  | 0.2706800000  | -0.7900870000 |
| C | 4.2618530000  | 0.2094810000  | 0.6074000000  |
| H | 2.8981880000  | 0.1046770000  | -2.5458470000 |
| C | 2.9695510000  | 0.0660270000  | -1.4637390000 |
| C | 3.1279740000  | -0.0523100000 | 1.3940330000  |
| C | 1.9204690000  | -0.2482220000 | 0.7242650000  |
| C | 1.8608390000  | -0.1892870000 | -0.6754500000 |
| H | 3.1888530000  | -0.0988170000 | 2.4768100000  |
| O | 0.5715970000  | -0.4287920000 | -1.0967630000 |
| N | 0.6283110000  | -0.5022230000 | 1.1542620000  |
| C | -0.1839340000 | -0.7580570000 | 0.0395520000  |
| C | -1.6293840000 | -0.4102070000 | 0.0051180000  |
| C | -2.5799590000 | -1.4083380000 | -0.0845670000 |
| C | -2.0589420000 | 0.9849450000  | 0.0624290000  |
| C | -3.9592350000 | -1.1038840000 | -0.1087280000 |
| H | -2.2598500000 | -2.4457780000 | -0.1331570000 |
| C | -3.4843410000 | 1.2590580000  | 0.0391130000  |
| C | -4.4019310000 | 0.2335020000  | -0.0436510000 |
| H | -4.6829670000 | -1.9096860000 | -0.1766520000 |
| H | -3.7948870000 | 2.2988880000  | 0.0900380000  |
| H | -5.4667220000 | 0.4474080000  | -0.0607820000 |
| O | -1.2161020000 | 1.9253770000  | 0.1243710000  |

|   |              |               |               |
|---|--------------|---------------|---------------|
| H | 0.3856450000 | -0.8168840000 | 2.0835250000  |
| H | 5.2176730000 | 0.3673700000  | 1.0989730000  |
| H | 5.0847260000 | 0.4753720000  | -1.3677330000 |

HNO (S<sub>0</sub>), enol tautomer

|   |               |               |               |
|---|---------------|---------------|---------------|
| C | -5.5685237194 | -0.7024964338 | -0.0000727099 |
| C | -4.3892456484 | -1.4156569367 | -0.0000025150 |
| C | -3.1281242101 | -0.7529141363 | -0.0000211004 |
| C | -3.1045937952 | 0.6933514367  | -0.0001158594 |
| C | -4.3473681728 | 1.3937903343  | -0.0001858579 |
| C | -5.5473755227 | 0.7175605532  | -0.0001651989 |
| H | -1.9142606937 | -2.5779412490 | 0.0001247579  |
| H | -6.5205146285 | -1.2266154753 | -0.0000575201 |
| H | -4.4050410801 | -2.5030036814 | 0.0000674151  |
| C | -1.9096937991 | -1.4924076031 | 0.0000523833  |
| C | -1.8675140628 | 1.3937048246  | -0.0001371307 |
| H | -4.3294447133 | 2.4811634161  | -0.0002558271 |
| H | -6.4833256418 | 1.2697960551  | -0.0002198680 |
| C | -0.7034048882 | 0.6541703889  | -0.0000663503 |
| C | -0.7534020112 | -0.7628040350 | 0.0000270027  |
| H | -1.8492661753 | 2.4797578368  | -0.0002061717 |
| O | 0.5499442281  | -1.2214459485 | 0.0000886198  |
| N | 0.6402416775  | 1.0340464922  | -0.0000635720 |
| C | 1.3197586969  | -0.0845418768 | 0.0000137254  |
| C | 2.7619409799  | -0.2112555776 | 0.0000691330  |
| C | 3.3873222078  | -1.4757746585 | 0.0002331122  |
| C | 3.5656774170  | 0.9602842271  | -0.0000204649 |
| C | 4.7716453025  | -1.5853841285 | 0.0003156804  |
| H | 2.7676658147  | -2.3668285577 | 0.0003041176  |
| C | 4.9623119148  | 0.8379289949  | 0.0000674159  |
| C | 5.5565439941  | -0.4205988210 | 0.0002336988  |
| H | 5.5615424962  | 1.7435659596  | -0.0000071120 |
| H | 6.6405267275  | -0.4971911406 | 0.0002963120  |
| O | 3.0404872573  | 2.2085342606  | -0.0002228662 |
| H | 2.0503783646  | 2.1448774123  | -0.0003234309 |
| H | 5.2408677121  | -2.5643518354 | 0.0004465176  |

HBO (S<sub>1</sub>), enol tautomer

|   |               |               |               |
|---|---------------|---------------|---------------|
| C | -5.5909410000 | -0.6881030000 | -0.0000830000 |
| C | -4.3759370000 | -1.4073100000 | 0.0000120000  |
| C | -3.1407880000 | -0.7531910000 | -0.0000130000 |
| C | -3.1132350000 | 0.6947090000  | -0.0001410000 |
| C | -4.3609260000 | 1.3924820000  | -0.0002350000 |
| C | -5.5761990000 | 0.7103530000  | -0.0002060000 |
| H | -1.9110150000 | -2.5821080000 | 0.0001800000  |
| H | -6.5327740000 | -1.2282000000 | -0.0000600000 |
| H | -4.3995540000 | -2.4938450000 | 0.0001060000  |
| C | -1.9002770000 | -1.4967190000 | 0.0000850000  |



|   |               |               |               |
|---|---------------|---------------|---------------|
| C | -1.8904240000 | 1.3905320000  | -0.0001710000 |
| H | -4.3472770000 | 2.4792720000  | -0.0003300000 |
| H | -6.5082800000 | 1.2673830000  | -0.0002790000 |
| C | -0.6792680000 | 0.6453690000  | -0.0000740000 |
| C | -0.7409120000 | -0.7788000000 | 0.0000520000  |
| H | -1.8679020000 | 2.4762470000  | -0.0002640000 |
| O | 0.5467940000  | -1.2468770000 | 0.0001270000  |
| N | 0.6079600000  | 1.0397430000  | -0.0000770000 |
| C | 1.3506520000  | -0.1125430000 | 0.0000450000  |
| C | 2.7483600000  | -0.2218710000 | 0.0000910000  |
| C | 3.4185170000  | -1.4893680000 | 0.0002250000  |
| C | 3.5717820000  | 0.9689890000  | 0.0000010000  |
| C | 4.8012930000  | -1.5661190000 | 0.0002670000  |
| H | 2.8191660000  | -2.3941700000 | 0.0002960000  |
| C | 4.9590590000  | 0.8630120000  | 0.0000450000  |
| C | 5.5840340000  | -0.3932960000 | 0.0001770000  |
| H | 5.5444000000  | 1.7785870000  | -0.0000260000 |
| H | 6.6683460000  | -0.4566160000 | 0.0002090000  |
| O | 3.0246050000  | 2.2134890000  | -0.0001260000 |
| H | 2.0351110000  | 2.1335170000  | -0.0001400000 |
| H | 5.2841260000  | -2.5399140000 | 0.0003700000  |

HNO (S<sub>0</sub>), keto tautomer

|   |               |               |               |
|---|---------------|---------------|---------------|
| C | 5.5602760000  | -0.7059750000 | 0.0001780000  |
| C | 4.3791730000  | -1.4171950000 | 0.0001280000  |
| C | 3.1217530000  | -0.7503740000 | 0.0000320000  |
| C | 3.1011030000  | 0.6939500000  | -0.0000050000 |
| C | 4.3425610000  | 1.3927400000  | 0.0000460000  |
| C | 5.5414070000  | 0.7126980000  | 0.0001370000  |
| H | 1.8998230000  | -2.5731940000 | -0.0000130000 |
| H | 6.5110780000  | -1.2318900000 | 0.0002520000  |
| H | 4.3919450000  | -2.5043260000 | 0.0001610000  |
| C | 1.9002850000  | -1.4880920000 | -0.0000300000 |
| C | 1.8637990000  | 1.3998660000  | -0.0000910000 |
| H | 4.3273230000  | 2.4798790000  | 0.0000200000  |
| H | 6.4781280000  | 1.2633740000  | 0.0001780000  |
| C | 0.7101470000  | 0.6543450000  | -0.0001110000 |
| C | 0.7468460000  | -0.7596110000 | -0.0000900000 |
| H | 1.8458890000  | 2.4850180000  | -0.0001360000 |
| O | -0.5622680000 | -1.2319330000 | -0.0001360000 |
| N | -0.6455160000 | 0.9762890000  | -0.0002790000 |
| C | -1.3743850000 | -0.1489930000 | -0.0002030000 |
| C | -2.7796560000 | -0.2269090000 | -0.0001370000 |
| C | -3.4446630000 | -1.4863360000 | -0.0001440000 |
| C | -3.5276140000 | 1.0273950000  | 0.0000100000  |
| C | -4.8189550000 | -1.5511990000 | 0.0000450000  |
| H | -2.8501310000 | -2.3958150000 | -0.0003200000 |
| C | -4.9607250000 | 0.8912370000  | 0.0003190000  |
| C | -5.5714900000 | -0.3433910000 | 0.0003100000  |

|   |               |               |               |
|---|---------------|---------------|---------------|
| H | -5.3268420000 | -2.5107140000 | -0.0000060000 |
| H | -5.5467020000 | 1.8067060000  | 0.0005300000  |
| H | -6.6581360000 | -0.3992040000 | 0.0005070000  |
| O | -2.9534240000 | 2.1710690000  | -0.0000490000 |
| H | -1.1674090000 | 1.8681210000  | -0.0000990000 |

HNO (S<sub>1</sub>), keto tautomer

|   |               |               |               |
|---|---------------|---------------|---------------|
| C | -5.5859960000 | -0.7365140000 | -0.0003620000 |
| C | -4.3861130000 | -1.4306940000 | -0.0004380000 |
| C | -3.1414080000 | -0.7519940000 | -0.0002680000 |
| C | -3.1371720000 | 0.6979700000  | -0.0000080000 |
| C | -4.3908600000 | 1.3748480000  | 0.0000630000  |
| C | -5.5853730000 | 0.6775660000  | -0.0001090000 |
| H | -1.8916280000 | -2.5613580000 | -0.0005460000 |
| H | -6.5277190000 | -1.2788780000 | -0.0004970000 |
| H | -4.3844680000 | -2.5183750000 | -0.0006320000 |
| C | -1.9046860000 | -1.4764620000 | -0.0003510000 |
| C | -1.9108750000 | 1.4203200000  | 0.0001680000  |
| H | -4.3922390000 | 2.4624560000  | 0.0002550000  |
| H | -6.5282250000 | 1.2185000000  | -0.0000490000 |
| C | -0.7343250000 | 0.6847800000  | 0.0000870000  |
| C | -0.7552920000 | -0.7351210000 | -0.0001690000 |
| H | -1.9062140000 | 2.5054610000  | 0.0003560000  |
| O | 0.5487190000  | -1.1910160000 | -0.0002090000 |
| N | 0.5995220000  | 1.0194940000  | 0.0001980000  |
| C | 1.3668930000  | -0.0987310000 | 0.0000070000  |
| C | 2.7937920000  | -0.2150060000 | 0.0000840000  |
| C | 3.4220630000  | -1.4553400000 | 0.0000120000  |
| C | 3.6112600000  | 1.0093410000  | 0.0002320000  |
| C | 4.8424360000  | -1.5618410000 | 0.0000790000  |
| H | 2.8258310000  | -2.3626950000 | -0.0000980000 |
| C | 5.0339480000  | 0.8488940000  | 0.0003330000  |
| C | 5.6390930000  | -0.4171430000 | 0.0002460000  |
| H | 5.6317700000  | 1.7560670000  | 0.0004660000  |
| H | 6.7217450000  | -0.5028230000 | 0.0003110000  |
| O | 3.0566390000  | 2.1598690000  | 0.0003450000  |
| H | 1.0532380000  | 1.9341250000  | 0.0003190000  |
| H | 5.2940720000  | -2.5490020000 | 0.0000090000  |

HNO (S<sub>1</sub>), TS

-1581.4 cm<sup>-1</sup>

|   |               |               |               |
|---|---------------|---------------|---------------|
| C | -5.5816090000 | -0.6186570000 | 0.0001000000  |
| C | -4.4044790000 | -1.3687710000 | 0.0001370000  |
| C | -3.1403570000 | -0.7501730000 | 0.0000130000  |
| C | -3.0716770000 | 0.7012350000  | -0.0001930000 |
| C | -4.3010090000 | 1.4359080000  | -0.0002150000 |
| C | -5.5243800000 | 0.7915310000  | -0.0000760000 |
| H | -1.9711900000 | -2.6158130000 | 0.0002400000  |

|   |               |               |               |
|---|---------------|---------------|---------------|
| H | -6.5434720000 | -1.1238490000 | 0.0002120000  |
| H | -4.4560300000 | -2.4549050000 | 0.0002780000  |
| C | -1.9290840000 | -1.5314140000 | 0.0000780000  |
| C | -1.8267890000 | 1.3636920000  | -0.0003520000 |
| H | -4.2529640000 | 2.5221950000  | -0.0003490000 |
| H | -6.4435260000 | 1.3710260000  | -0.0000980000 |
| C | -0.6584260000 | 0.5796580000  | -0.0003170000 |
| C | -0.7510680000 | -0.8491330000 | -0.0000680000 |
| H | -1.7718630000 | 2.4477950000  | -0.0004710000 |
| O | 0.5306560000  | -1.3642670000 | -0.0000720000 |
| N | 0.6577260000  | 0.8919730000  | -0.0005420000 |
| C | 1.3671140000  | -0.2729100000 | -0.0003340000 |
| C | 2.7719740000  | -0.3088000000 | 0.0001520000  |
| C | 3.5506720000  | -1.4855750000 | 0.0002640000  |
| C | 3.4585420000  | 0.9983340000  | 0.0001770000  |
| C | 4.9471850000  | -1.4099400000 | 0.0003860000  |
| H | 3.0560040000  | -2.4519610000 | 0.0001870000  |
| C | 4.8721830000  | 1.0233440000  | 0.0001370000  |
| C | 5.6090470000  | -0.1620560000 | 0.0002990000  |
| H | 5.3613950000  | 1.9932300000  | 0.0001240000  |
| H | 6.6945040000  | -0.1256570000 | 0.0003390000  |
| O | 2.7588110000  | 2.1053790000  | 0.0002990000  |
| H | 1.5514140000  | 1.7749740000  | -0.0000650000 |
| H | 5.5288920000  | -2.3273710000 | 0.0004570000  |

HNO K\*<sub>90</sub> (S<sub>1</sub>)

|   |               |               |               |
|---|---------------|---------------|---------------|
| C | -5.5274080000 | -0.7969840000 | 0.2628370000  |
| C | -4.3040970000 | -1.4471070000 | 0.2338820000  |
| C | -3.0935070000 | -0.7354520000 | 0.0485370000  |
| C | -3.1495570000 | 0.6987270000  | -0.1133940000 |
| C | -4.4204230000 | 1.3307130000  | -0.0783680000 |
| C | -5.5839490000 | 0.6032860000  | 0.1052420000  |
| H | -1.7710690000 | -2.4886280000 | 0.1527840000  |
| H | -6.4421140000 | -1.3655360000 | 0.4081840000  |
| H | -4.2573940000 | -2.5271560000 | 0.3559840000  |
| C | -1.8301210000 | -1.4131750000 | 0.0234610000  |
| C | -1.9509910000 | 1.4520310000  | -0.3065010000 |
| H | -4.4665510000 | 2.4110910000  | -0.1986160000 |
| H | -6.5434960000 | 1.1135280000  | 0.1292470000  |
| C | -0.7521610000 | 0.7625080000  | -0.3231940000 |
| C | -0.7108450000 | -0.6460840000 | -0.1557170000 |
| H | -1.9974980000 | 2.5300170000  | -0.4284700000 |
| O | 0.5981090000  | -1.0668140000 | -0.2282310000 |
| N | 0.5644810000  | 1.1360240000  | -0.5117110000 |
| C | 1.3769380000  | 0.0290420000  | -0.4828230000 |
| C | 2.8593800000  | -0.0177770000 | -0.3093400000 |
| C | 3.6939230000  | -0.2389470000 | -1.3782870000 |
| C | 3.4079670000  | 0.1668440000  | 1.0152320000  |
| C | 5.1012590000  | -0.3003440000 | -1.1943640000 |

|   |              |               |               |
|---|--------------|---------------|---------------|
| H | 3.2771040000 | -0.3785160000 | -2.3726580000 |
| C | 4.8442920000 | 0.0917520000  | 1.1779290000  |
| C | 5.6610470000 | -0.1366930000 | 0.0828280000  |
| H | 5.2470860000 | 0.2212560000  | 2.1781070000  |
| H | 6.7397190000 | -0.1918550000 | 0.2050730000  |
| O | 2.6365320000 | 0.4053900000  | 1.9892260000  |
| H | 0.9107510000 | 2.0838500000  | -0.5336390000 |
| H | 5.7444800000 | -0.4828590000 | -2.0497290000 |

1H2NBO (S<sub>0</sub>), *enol* tautomer

|   |               |               |              |
|---|---------------|---------------|--------------|
| O | 1.9419620000  | -0.8478170000 | 0.0000000000 |
| C | 1.3882840000  | 0.3831020000  | 0.0000000000 |
| C | 0.0000000000  | 0.5919440000  | 0.0000000000 |
| C | -0.5131370000 | 1.9250990000  | 0.0000000000 |
| C | 0.3282380000  | 3.0068720000  | 0.0000000000 |
| C | 2.2856910000  | 1.4984460000  | 0.0000000000 |
| C | 1.7443050000  | 2.8236430000  | 0.0000000000 |
| C | -0.8883370000 | -0.5490910000 | 0.0000000000 |
| C | 3.6946920000  | 1.3172150000  | 0.0000000000 |
| N | -0.5355050000 | -1.8139140000 | 0.0000000000 |
| C | -1.7326210000 | -2.5291590000 | 0.0000000000 |
| O | -2.2437610000 | -0.3422460000 | 0.0000000000 |
| H | -1.5890310000 | 2.0669400000  | 0.0000000000 |
| C | -2.7905790000 | -1.6086750000 | 0.0000000000 |
| C | -1.9997740000 | -3.9021390000 | 0.0000000000 |
| C | -3.3426960000 | -4.2898030000 | 0.0000000000 |
| H | -3.5899080000 | -5.3476890000 | 0.0000000000 |
| C | -4.3872980000 | -3.3432790000 | 0.0000000000 |
| C | -4.1300110000 | -1.9663840000 | 0.0000000000 |
| H | -1.1963360000 | -4.6325520000 | 0.0000000000 |
| H | -5.4173920000 | -3.6877910000 | 0.0000000000 |
| H | -4.9265240000 | -1.2293840000 | 0.0000000000 |
| C | 2.6434790000  | 3.9233620000  | 0.0000000000 |
| H | -0.0739460000 | 4.0162650000  | 0.0000000000 |
| C | 4.5407640000  | 2.4091780000  | 0.0000000000 |
| C | 4.0104740000  | 3.7229020000  | 0.0000000000 |
| H | 2.2351810000  | 4.9312520000  | 0.0000000000 |
| H | 4.0967610000  | 0.3095950000  | 0.0000000000 |
| H | 5.6173830000  | 2.2621190000  | 0.0000000000 |
| H | 4.6844760000  | 4.5755270000  | 0.0000000000 |
| H | 1.2134090000  | -1.5257740000 | 0.0000000000 |

1H2NBO (S<sub>1</sub>), *enol* tautomer

|   |               |               |              |
|---|---------------|---------------|--------------|
| O | 1.8212120000  | -1.0077040000 | 0.0000000000 |
| C | 1.4275720000  | 0.2725440000  | 0.0000000000 |
| C | 0.0000000000  | 0.6054120000  | 0.0000000000 |
| C | -0.3481310000 | 1.9810920000  | 0.0000000000 |
| C | 0.6141420000  | 2.9722870000  | 0.0000000000 |

|   |               |               |              |
|---|---------------|---------------|--------------|
| C | 2.4139760000  | 1.2795410000  | 0.0000000000 |
| C | 2.0141140000  | 2.6664440000  | 0.0000000000 |
| C | -0.9583840000 | -0.4231200000 | 0.0000000000 |
| C | 3.8086130000  | 0.9774460000  | 0.0000000000 |
| N | -0.7120950000 | -1.7526680000 | 0.0000000000 |
| C | -1.9332570000 | -2.3577620000 | 0.0000000000 |
| O | -2.3208000000 | -0.1298020000 | 0.0000000000 |
| H | -1.3987420000 | 2.2526160000  | 0.0000000000 |
| C | -2.9407350000 | -1.3550200000 | 0.0000000000 |
| C | -2.3116940000 | -3.7175820000 | 0.0000000000 |
| C | -3.6778250000 | -4.0038560000 | 0.0000000000 |
| H | -4.0014880000 | -5.0413310000 | 0.0000000000 |
| C | -4.6547930000 | -2.9859380000 | 0.0000000000 |
| C | -4.2955960000 | -1.6230120000 | 0.0000000000 |
| H | -1.5638710000 | -4.5046510000 | 0.0000000000 |
| H | -5.7069140000 | -3.2555750000 | 0.0000000000 |
| H | -5.0391980000 | -0.8326110000 | 0.0000000000 |
| C | 2.9950430000  | 3.6677640000  | 0.0000000000 |
| H | 0.3066910000  | 4.0145450000  | 0.0000000000 |
| C | 4.7564410000  | 1.9981750000  | 0.0000000000 |
| C | 4.3640580000  | 3.3478080000  | 0.0000000000 |
| H | 2.6823420000  | 4.7093060000  | 0.0000000000 |
| H | 4.1270690000  | -0.0597860000 | 0.0000000000 |
| H | 5.8127620000  | 1.7422540000  | 0.0000000000 |
| H | 5.1088920000  | 4.1377230000  | 0.0000000000 |
| H | 1.0125570000  | -1.6071000000 | 0.0000000000 |

2H1NBO (S<sub>0</sub>), *enol* tautomer

|   |               |               |               |
|---|---------------|---------------|---------------|
| C | 2.7607690000  | 0.5535820000  | 0.0000070000  |
| C | 2.4559720000  | -0.8122350000 | 0.0000130000  |
| C | 3.4070980000  | -1.8208520000 | 0.0000310000  |
| C | 4.7402050000  | -1.3918030000 | 0.0000300000  |
| C | 5.0750110000  | -0.0224050000 | 0.0000270000  |
| C | 4.0951240000  | 0.9737850000  | 0.0000210000  |
| C | 0.6048400000  | 0.3547330000  | -0.0001100000 |
| H | 3.1379690000  | -2.8719340000 | 0.0000430000  |
| H | 5.5334760000  | -2.1335790000 | 0.0000450000  |
| H | 6.1229150000  | 0.2638580000  | 0.0000460000  |
| H | 4.3544210000  | 2.0280580000  | 0.0000390000  |
| C | -0.8208450000 | 0.6411950000  | -0.0000860000 |
| C | -1.8685400000 | -0.3671940000 | -0.0000490000 |
| C | -1.1896670000 | 2.0062070000  | -0.0000310000 |
| C | -1.6376910000 | -1.7728170000 | -0.0000880000 |
| C | -3.2392800000 | 0.0632440000  | 0.0000350000  |
| C | -2.5533400000 | 2.3974450000  | 0.0000630000  |
| C | -2.6852720000 | -2.6781730000 | -0.0000550000 |
| H | -0.6288430000 | -2.1560360000 | -0.0001490000 |
| C | -4.2912520000 | -0.8898950000 | 0.0000690000  |
| C | -3.5441840000 | 1.4547580000  | 0.0000920000  |

|   |               |               |               |
|---|---------------|---------------|---------------|
| H | -2.7756830000 | 3.4600160000  | 0.0001040000  |
| C | -4.0278420000 | -2.2440890000 | 0.0000240000  |
| H | -2.4627080000 | -3.7422040000 | -0.0000910000 |
| H | -5.3161810000 | -0.5261510000 | 0.0001330000  |
| H | -4.5871310000 | 1.7612700000  | 0.0001640000  |
| H | -4.8392780000 | -2.9664380000 | 0.0000520000  |
| O | 1.0828360000  | -0.9314990000 | 0.0000170000  |
| N | 1.5627760000  | 1.2592060000  | 0.0000410000  |
| O | -0.3063130000 | 3.0245700000  | -0.0000710000 |
| H | 0.6228040000  | 2.6511980000  | -0.0001950000 |

2H1NBO (S<sub>1</sub>), *enol* tautomer

|   |               |               |               |
|---|---------------|---------------|---------------|
| C | 2.7461950000  | 0.5582630000  | -0.0000750000 |
| C | 2.4437360000  | -0.8311020000 | 0.0000580000  |
| C | 3.3964200000  | -1.8293990000 | 0.0000800000  |
| C | 4.7363120000  | -1.3963210000 | -0.0000370000 |
| C | 5.0708250000  | -0.0218860000 | -0.0001710000 |
| C | 4.0980880000  | 0.9740450000  | -0.0001930000 |
| C | 0.5791840000  | 0.3388920000  | 0.0000850000  |
| H | 3.1319010000  | -2.8816170000 | 0.0001780000  |
| H | 5.5307810000  | -2.1366920000 | -0.0000260000 |
| H | 6.1200670000  | 0.2601310000  | -0.0002600000 |
| H | 4.3567620000  | 2.0281870000  | -0.0002970000 |
| C | -0.7967310000 | 0.6245800000  | 0.0000890000  |
| C | -1.8737060000 | -0.3730970000 | 0.0000400000  |
| C | -1.1916110000 | 2.0480670000  | 0.0000690000  |
| C | -1.6504960000 | -1.7662180000 | 0.0000360000  |
| C | -3.2438770000 | 0.0802270000  | -0.0000340000 |
| C | -2.5266580000 | 2.4249660000  | -0.0000110000 |
| C | -2.7070070000 | -2.6952530000 | -0.0000220000 |
| H | -0.6412480000 | -2.1499650000 | 0.0000780000  |
| C | -4.2875830000 | -0.8763340000 | -0.0000920000 |
| C | -3.5445290000 | 1.4657900000  | -0.0000610000 |
| H | -2.7569560000 | 3.4859410000  | -0.0000200000 |
| C | -4.0287130000 | -2.2496000000 | -0.0000840000 |
| H | -2.4799950000 | -3.7572400000 | -0.0000210000 |
| H | -5.3148510000 | -0.5193610000 | -0.0001470000 |
| H | -4.5845310000 | 1.7805950000  | -0.0001210000 |
| H | -4.8530520000 | -2.9573710000 | -0.0001310000 |
| O | 1.0804110000  | -0.9616910000 | 0.0001370000  |
| N | 1.5854610000  | 1.2558850000  | -0.0000590000 |
| O | -0.2769020000 | 3.0329780000  | 0.0001970000  |
| H | 0.6457190000  | 2.6321910000  | 0.0004400000  |

2H1NBO (S<sub>0</sub>), *keto* tautomer

|   |              |               |               |
|---|--------------|---------------|---------------|
| C | 2.7580540000 | 0.5439800000  | -0.0001200000 |
| C | 2.4403170000 | -0.8070010000 | 0.0000920000  |
| C | 3.3846900000 | -1.8074940000 | 0.0002290000  |

|   |               |               |               |
|---|---------------|---------------|---------------|
| C | 4.7147770000  | -1.3895480000 | 0.0001420000  |
| C | 5.0506450000  | -0.0343170000 | -0.0000890000 |
| C | 4.0784810000  | 0.9625030000  | -0.0002340000 |
| C | 0.5469480000  | 0.3051250000  | -0.0000140000 |
| H | 3.1075200000  | -2.8534870000 | 0.0003930000  |
| H | 5.5016990000  | -2.1336720000 | 0.0002450000  |
| H | 6.0961270000  | 0.2499910000  | -0.0001620000 |
| H | 4.3398140000  | 2.0128580000  | -0.0004200000 |
| C | -0.8137580000 | 0.6177120000  | 0.0000010000  |
| C | -1.8846880000 | -0.3714540000 | -0.0000380000 |
| C | -1.1099120000 | 2.0418410000  | 0.0001410000  |
| C | -1.6838050000 | -1.7673890000 | -0.0001230000 |
| C | -3.2234600000 | 0.0890350000  | -0.0000380000 |
| C | -2.5105690000 | 2.4233930000  | 0.0001400000  |
| C | -2.7493860000 | -2.6458610000 | -0.0001900000 |
| H | -0.6841000000 | -2.1720850000 | -0.0001440000 |
| C | -4.2905250000 | -0.8227510000 | -0.0001060000 |
| C | -3.4916270000 | 1.5036640000  | 0.0000380000  |
| H | -2.7150450000 | 3.4872990000  | 0.0002610000  |
| C | -4.0667820000 | -2.1815310000 | -0.0001810000 |
| H | -2.5537650000 | -3.7127110000 | -0.0002560000 |
| H | -5.3040450000 | -0.4336930000 | -0.0001010000 |
| H | -4.5310340000 | 1.8197310000  | 0.0000610000  |
| H | -4.8962350000 | -2.8788490000 | -0.0002370000 |
| O | 1.0709700000  | -0.9383200000 | 0.0001100000  |
| N | 1.5439110000  | 1.2068740000  | -0.0002190000 |
| O | -0.2324730000 | 2.9390820000  | 0.0004490000  |
| H | 1.2273160000  | 2.2009770000  | -0.0004610000 |

2H1NBO (S<sub>1</sub>), *keto* tautomer

|   |               |               |               |
|---|---------------|---------------|---------------|
| C | 2.7618480000  | 0.5605500000  | 0.0000310000  |
| C | 2.4494000000  | -0.8008610000 | -0.0000170000 |
| C | 3.4007700000  | -1.7949800000 | -0.0000550000 |
| C | 4.7312420000  | -1.3679900000 | -0.0000410000 |
| C | 5.0601720000  | -0.0099650000 | 0.0000140000  |
| C | 4.0873900000  | 0.9853070000  | 0.0000550000  |
| C | 0.5483770000  | 0.3066050000  | 0.0000230000  |
| H | 3.1296920000  | -2.8424970000 | -0.0000900000 |
| H | 5.5225850000  | -2.1074560000 | -0.0000690000 |
| H | 6.1050930000  | 0.2772380000  | 0.0000280000  |
| H | 4.3448870000  | 2.0364620000  | 0.0001010000  |
| C | -0.8343810000 | 0.6071860000  | 0.0000340000  |
| C | -1.8787590000 | -0.3629490000 | 0.0000200000  |
| C | -1.1812810000 | 2.0679810000  | 0.0000430000  |
| C | -1.6524380000 | -1.7693920000 | 0.0000010000  |
| C | -3.2552720000 | 0.0953100000  | 0.0000290000  |
| C | -2.5536410000 | 2.4255090000  | -0.0000270000 |
| C | -2.6890000000 | -2.6732450000 | 0.0000010000  |
| H | -0.6414060000 | -2.1451980000 | -0.0000130000 |

|   |               |               |               |
|---|---------------|---------------|---------------|
| C | -4.2843140000 | -0.8607270000 | 0.0000270000  |
| C | -3.5528010000 | 1.4793400000  | -0.0000030000 |
| H | -2.7709820000 | 3.4864980000  | -0.0000940000 |
| C | -4.0190650000 | -2.2143910000 | 0.0000170000  |
| H | -2.4791420000 | -3.7359490000 | -0.0000160000 |
| H | -5.3113990000 | -0.5105310000 | 0.0000280000  |
| H | -4.5940670000 | 1.7827140000  | -0.0000310000 |
| H | -4.8372720000 | -2.9259400000 | 0.0000140000  |
| O | 1.0887870000  | -0.9414250000 | -0.0000140000 |
| N | 1.5591080000  | 1.2101260000  | 0.0000680000  |
| O | -0.2717790000 | 2.9377550000  | -0.0001600000 |
| H | 1.2527140000  | 2.2034170000  | 0.0001560000  |

2H3NBO (S<sub>0</sub>), *enol* tautomer

|   |               |               |              |
|---|---------------|---------------|--------------|
| O | -2.1496200000 | 1.6911080000  | 0.0000000000 |
| C | -0.7914650000 | 1.7259140000  | 0.0000000000 |
| C | 0.0000000000  | 0.5229380000  | 0.0000000000 |
| C | 1.3863240000  | 0.6181340000  | 0.0000000000 |
| C | 2.0441180000  | 1.8683320000  | 0.0000000000 |
| C | -0.1645820000 | 2.9565680000  | 0.0000000000 |
| C | 1.2481510000  | 3.0644080000  | 0.0000000000 |
| C | -0.6603500000 | -0.7696120000 | 0.0000000000 |
| C | 3.4651580000  | 1.9749580000  | 0.0000000000 |
| H | -0.7764590000 | 3.8546020000  | 0.0000000000 |
| C | 1.9133140000  | 4.3240290000  | 0.0000000000 |
| N | -1.9520860000 | -0.9845540000 | 0.0000000000 |
| C | -2.0955200000 | -2.3715460000 | 0.0000000000 |
| O | 0.1001480000  | -1.9089980000 | 0.0000000000 |
| H | 1.9804120000  | -0.2909380000 | 0.0000000000 |
| C | -0.8147200000 | -2.9405800000 | 0.0000000000 |
| C | -3.2274660000 | -3.1926260000 | 0.0000000000 |
| C | -3.0116940000 | -4.5728670000 | 0.0000000000 |
| H | -3.8656790000 | -5.2441080000 | 0.0000000000 |
| C | -1.7123430000 | -5.1194120000 | 0.0000000000 |
| C | -0.5730170000 | -4.3056630000 | 0.0000000000 |
| H | -4.2283050000 | -2.7720630000 | 0.0000000000 |
| H | -1.5899630000 | -6.1985550000 | 0.0000000000 |
| H | 0.4311660000  | -4.7163270000 | 0.0000000000 |
| H | 1.3169160000  | 5.2333150000  | 0.0000000000 |
| C | 3.2906520000  | 4.3931390000  | 0.0000000000 |
| C | 4.0770280000  | 3.2093040000  | 0.0000000000 |
| H | 4.0586020000  | 1.0636320000  | 0.0000000000 |
| H | 3.7832470000  | 5.3620180000  | 0.0000000000 |
| H | 5.1609700000  | 3.2831630000  | 0.0000000000 |
| H | -2.4520490000 | 0.7477330000  | 0.0000000000 |

2H3NBO (S<sub>1</sub>), *enol* tautomer

|   |               |              |              |
|---|---------------|--------------|--------------|
| O | -2.2824350000 | 1.2428860000 | 0.0000000000 |
|---|---------------|--------------|--------------|



|   |               |               |              |
|---|---------------|---------------|--------------|
| C | -0.9854360000 | 1.5144940000  | 0.0000000000 |
| C | 0.0000000000  | 0.4457600000  | 0.0000000000 |
| C | 1.3497150000  | 0.8376620000  | 0.0000000000 |
| C | 1.7559680000  | 2.2073870000  | 0.0000000000 |
| C | -0.6031840000 | 2.8716300000  | 0.0000000000 |
| C | 0.7591270000  | 3.2516560000  | 0.0000000000 |
| C | -0.4628890000 | -0.8902980000 | 0.0000000000 |
| C | 3.1057180000  | 2.5911210000  | 0.0000000000 |
| H | -1.3898980000 | 3.6206790000  | 0.0000000000 |
| C | 1.1583270000  | 4.6090720000  | 0.0000000000 |
| N | -1.7513060000 | -1.2827990000 | 0.0000000000 |
| C | -1.7161460000 | -2.6612270000 | 0.0000000000 |
| O | 0.4319250000  | -1.9513530000 | 0.0000000000 |
| H | 2.1212610000  | 0.0728500000  | 0.0000000000 |
| C | -0.3670110000 | -3.0789970000 | 0.0000000000 |
| C | -2.7340610000 | -3.6283590000 | 0.0000000000 |
| C | -2.3490940000 | -4.9765650000 | 0.0000000000 |
| H | -3.1183980000 | -5.7447940000 | 0.0000000000 |
| C | -0.9977240000 | -5.3633960000 | 0.0000000000 |
| C | 0.0335010000  | -4.4023010000 | 0.0000000000 |
| H | -3.7811700000 | -3.3391270000 | 0.0000000000 |
| H | -0.7396810000 | -6.4186770000 | 0.0000000000 |
| H | 1.0818440000  | -4.6853300000 | 0.0000000000 |
| H | 0.3920840000  | 5.3803370000  | 0.0000000000 |
| C | 2.5174300000  | 4.9653290000  | 0.0000000000 |
| C | 3.4815850000  | 3.9554190000  | 0.0000000000 |
| H | 3.8781240000  | 1.8261930000  | 0.0000000000 |
| H | 2.8096040000  | 6.0104620000  | 0.0000000000 |
| H | 4.5376910000  | 4.2101830000  | 0.0000000000 |
| H | -2.4031970000 | 0.2242300000  | 0.0000000000 |

2H3NBO (S<sub>0</sub>), *keto* tautomer

|   |               |               |              |
|---|---------------|---------------|--------------|
| O | -2.2821740000 | 1.2917440000  | 0.0000000000 |
| C | -1.0213330000 | 1.5721850000  | 0.0000000000 |
| C | 0.0000000000  | 0.5131300000  | 0.0000000000 |
| C | 1.3689330000  | 0.8035210000  | 0.0000000000 |
| C | 1.8283730000  | 2.1272530000  | 0.0000000000 |
| C | -0.5225460000 | 2.8953470000  | 0.0000000000 |
| C | 0.8496830000  | 3.1939140000  | 0.0000000000 |
| C | -0.4582310000 | -0.8320500000 | 0.0000000000 |
| C | 3.2220890000  | 2.4484320000  | 0.0000000000 |
| H | -1.2469160000 | 3.7069350000  | 0.0000000000 |
| C | 1.3353060000  | 4.5425780000  | 0.0000000000 |
| N | -1.7375930000 | -1.2069220000 | 0.0000000000 |
| C | -1.8061930000 | -2.5979510000 | 0.0000000000 |
| O | 0.3498110000  | -1.9106590000 | 0.0000000000 |
| H | 2.0900690000  | -0.0101700000 | 0.0000000000 |
| C | -0.4763590000 | -3.0285700000 | 0.0000000000 |
| C | -2.8583600000 | -3.5113010000 | 0.0000000000 |

|   |               |               |              |
|---|---------------|---------------|--------------|
| C | -2.5053180000 | -4.8645230000 | 0.0000000000 |
| H | -3.2911940000 | -5.6136790000 | 0.0000000000 |
| C | -1.1611800000 | -5.2817480000 | 0.0000000000 |
| C | -0.1050520000 | -4.3615060000 | 0.0000000000 |
| H | -3.8938870000 | -3.1886530000 | 0.0000000000 |
| H | -0.9341380000 | -6.3433490000 | 0.0000000000 |
| H | 0.9345460000  | -4.6701840000 | 0.0000000000 |
| H | 0.6124520000  | 5.3552790000  | 0.0000000000 |
| C | 2.6831740000  | 4.8116370000  | 0.0000000000 |
| C | 3.6444210000  | 3.7555460000  | 0.0000000000 |
| H | 3.9429580000  | 1.6334520000  | 0.0000000000 |
| H | 3.0273620000  | 5.8430750000  | 0.0000000000 |
| H | 4.7047320000  | 3.9925680000  | 0.0000000000 |
| H | -2.4283740000 | -0.4208670000 | 0.0000000000 |

2H3NBO (S<sub>1</sub>), *keto* tautomer

|   |               |               |               |
|---|---------------|---------------|---------------|
| O | -0.3031250000 | 2.6649080000  | -0.0000200000 |
| C | -1.0482490000 | 1.6288200000  | -0.0000060000 |
| C | -0.4460180000 | 0.2755960000  | 0.0000010000  |
| C | -1.2809470000 | -0.8303090000 | 0.0000030000  |
| C | -2.7184130000 | -0.7261730000 | 0.0000020000  |
| C | -2.4644480000 | 1.7177110000  | -0.0000060000 |
| C | -3.3195320000 | 0.5788160000  | -0.0000020000 |
| C | 0.9650550000  | 0.1462000000  | 0.0000030000  |
| C | -3.5434240000 | -1.8555270000 | 0.0000050000  |
| H | -2.8958410000 | 2.7156610000  | -0.0000130000 |
| C | -4.7249440000 | 0.6834900000  | -0.0000020000 |
| N | 1.9267100000  | 1.1157040000  | 0.0000180000  |
| C | 3.1779430000  | 0.5312370000  | 0.0000070000  |
| O | 1.5812320000  | -1.0809450000 | -0.0000030000 |
| H | -0.8480300000 | -1.8276190000 | 0.0000070000  |
| C | 2.9464460000  | -0.8531310000 | -0.0000010000 |
| C | 4.4792120000  | 1.0366300000  | 0.0000100000  |
| C | 5.5205660000  | 0.0965320000  | 0.0000020000  |
| H | 6.5471640000  | 0.4515330000  | 0.0000040000  |
| C | 5.2731090000  | -1.2843960000 | -0.0000070000 |
| C | 3.9600940000  | -1.7918840000 | -0.0000080000 |
| H | 4.6746620000  | 2.1037890000  | 0.0000180000  |
| H | 6.1077370000  | -1.9788150000 | -0.0000120000 |
| H | 3.7527180000  | -2.8566840000 | -0.0000160000 |
| H | -5.1802950000 | 1.6709310000  | -0.0000050000 |
| C | -5.5358870000 | -0.4632000000 | 0.0000010000  |
| C | -4.9480570000 | -1.7285620000 | 0.0000050000  |
| H | -3.0930780000 | -2.8452630000 | 0.0000080000  |
| H | -6.6172540000 | -0.3608470000 | 0.0000010000  |
| H | -5.5669490000 | -2.6212740000 | 0.0000070000  |
| H | 1.6523130000  | 2.0958520000  | 0.0000100000  |

[<sup>1</sup>] E. Espinosa, E. Molins, C. Lecomte, *Chem. Phys. Lett.* 1998, **285**, 170–173.

[<sup>2</sup>] A. J. Stasyuk, M. K. Cyrański, D. T. Gryko, M. Solà, *J. Chem. Theory Comput.*, 2015, **11**, 1046-1054.
